# Supplementary material for: Anticancer and biological properties of new axially disubstituted silicon phthalocyanines
Source: Royal Society of Chemistry journal article supplement (doi:10.1039/d2dt01033j), 2022-01-01
Supplement: d2dt01033j1.pdf [file d2dt01033j1.pdf]

## Anticancer and Biological Properties of New Axially Disubstituted Silicon Phthalocyanines

Nazli Farajzadeh,<sup>a</sup> Nilgün Güler Kuşçulu,<sup>b</sup> H. Yasemin Yenilmez,<sup>a</sup> Dilek Bahar,<sup>c</sup> and Zehra Altuntaş Bayır<sup>\*a</sup>

a. Department of Chemistry, Istanbul Technical University, TR-34469 Istanbul, Turkey. E-mail: bayir@itu.edu.tr

b. Department of Chemistry Technology, Mustafa Çıkrıkçıoğlu Vocational School, Kayseri University, TR-38280 Kayseri, Turkey.

c. Genome & Stem Cell Center (GENKOK), Erciyes University, TR-38280 Kayseri, Turkey.

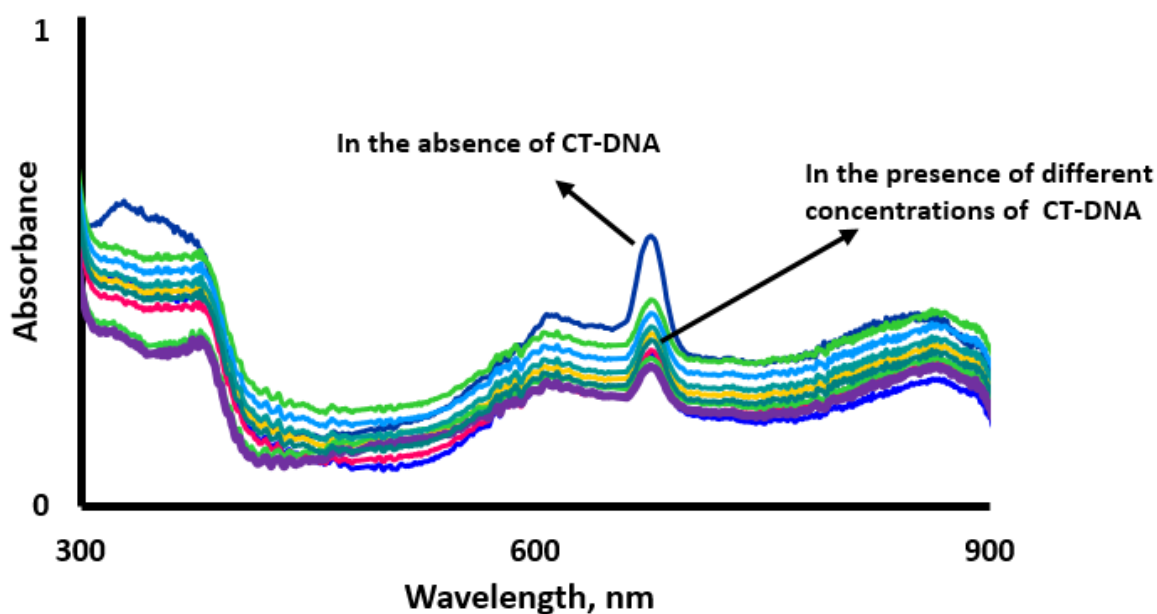

Figure S1. The UV-vis spectra of compound 1-QSi in the absence and presence of different concentrations of CT-DNA (0.25-2 mg/mL).

### <sup>1</sup>H NMR Spectrum of Compound 1-Si

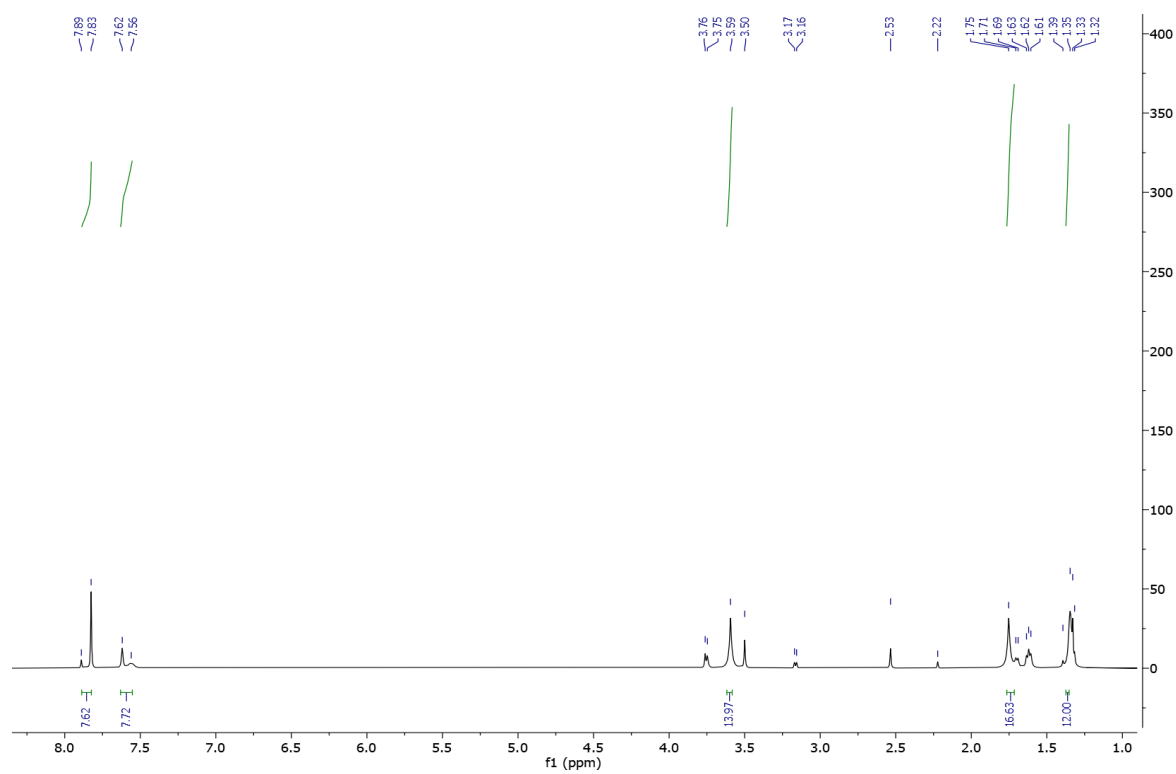

### <sup>1</sup>H NMR Spectrum of Compound 1-QSi

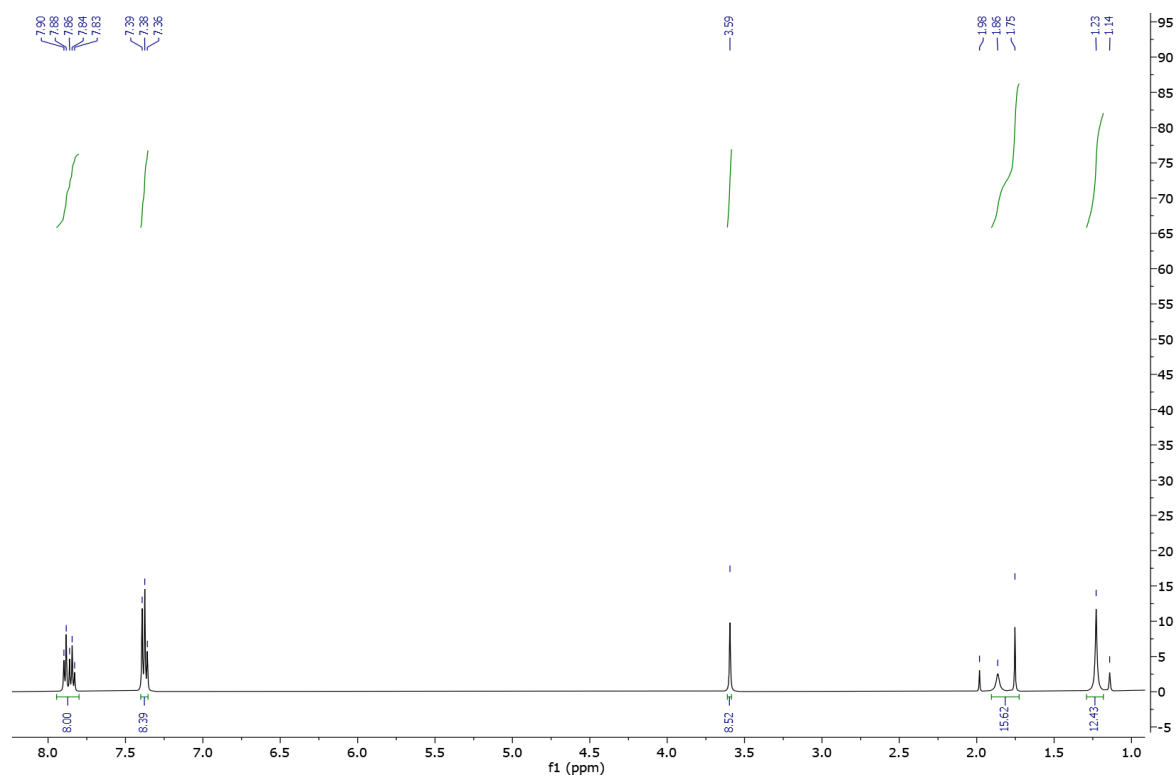

### <sup>1</sup>H NMR Spectrum of Compound 2-Si

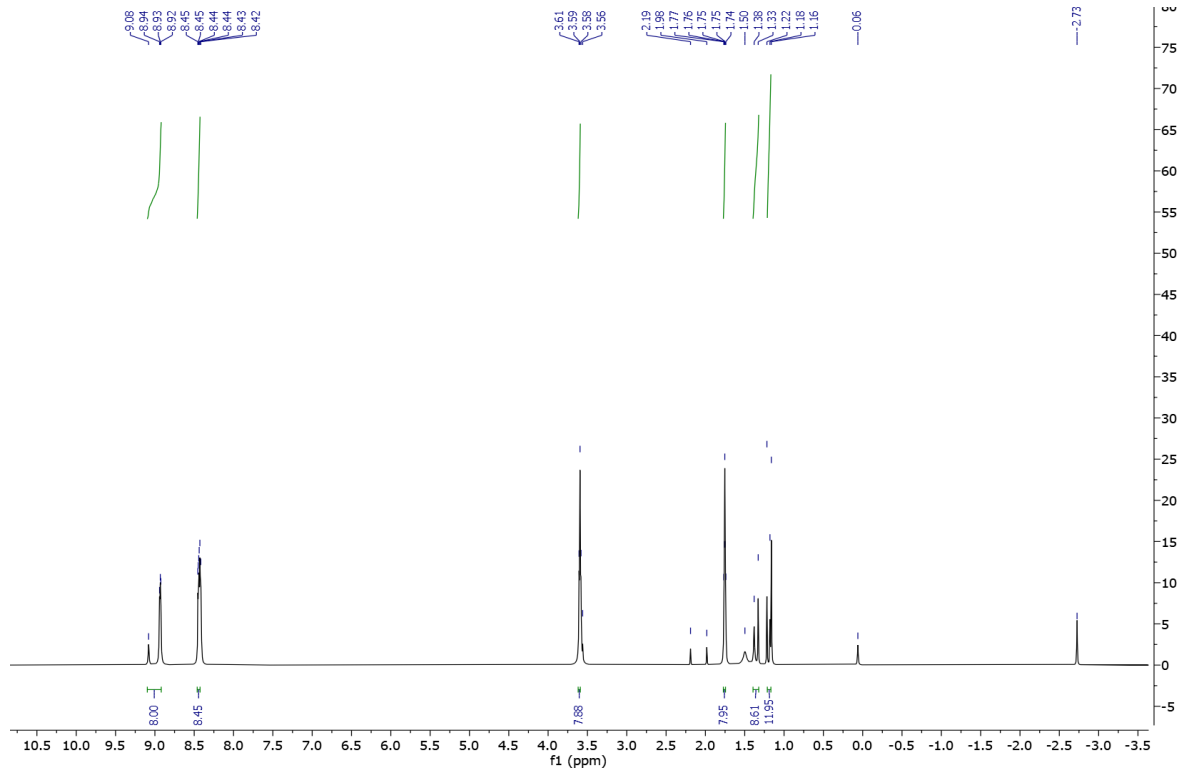

### <sup>1</sup>H NMR Spectrum of Compound 2-QSi

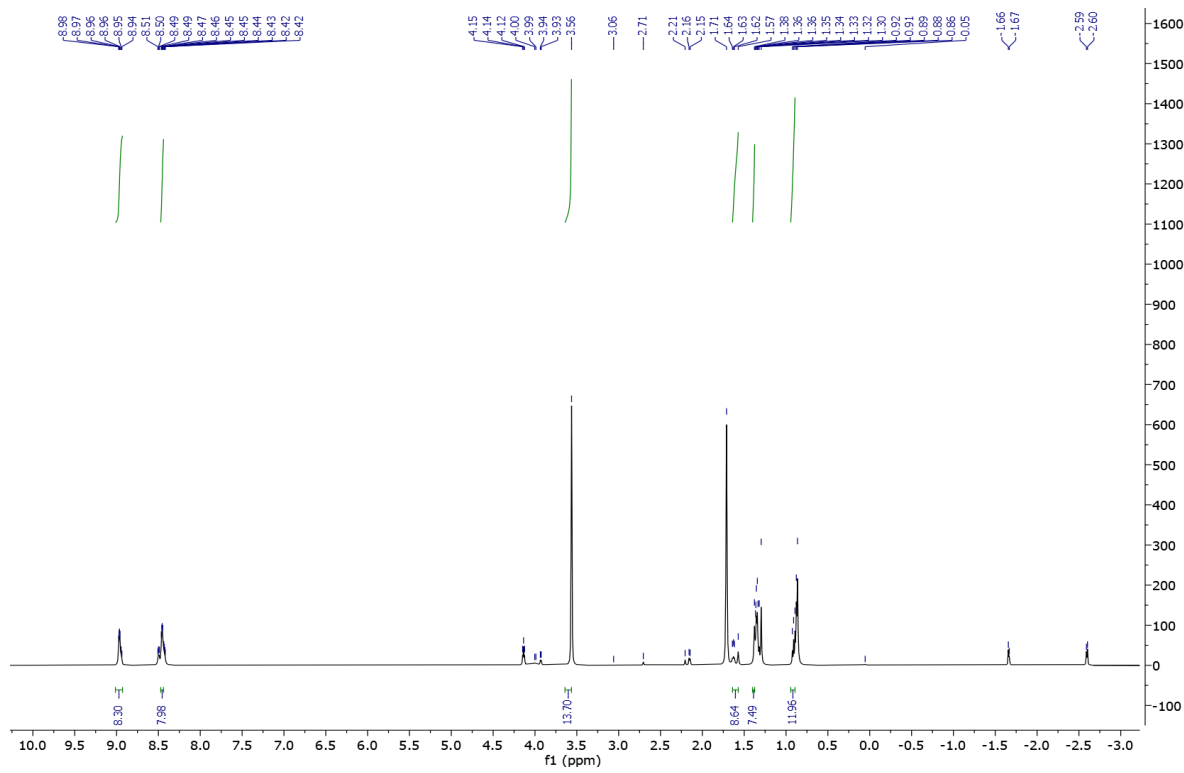

### <sup>1</sup>H NMR Spectrum of Compound 3-Si

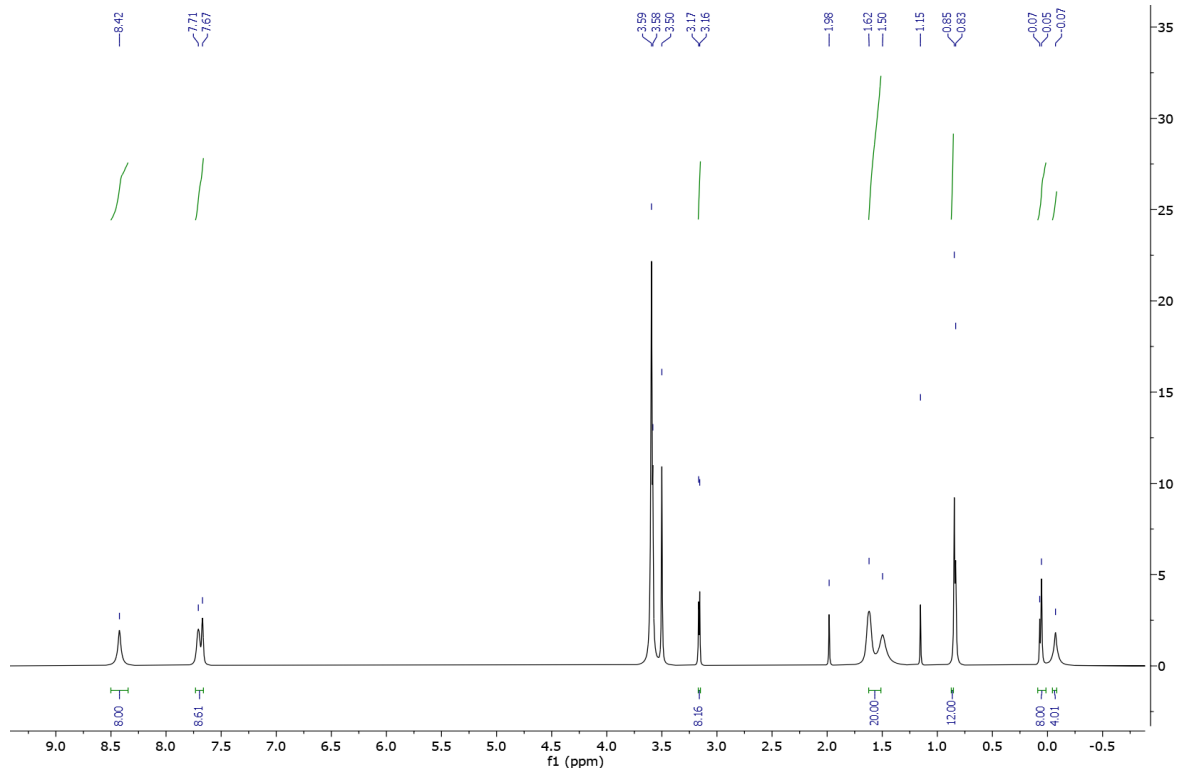

### <sup>1</sup>H NMR Spectrum of Compound 3-QSi

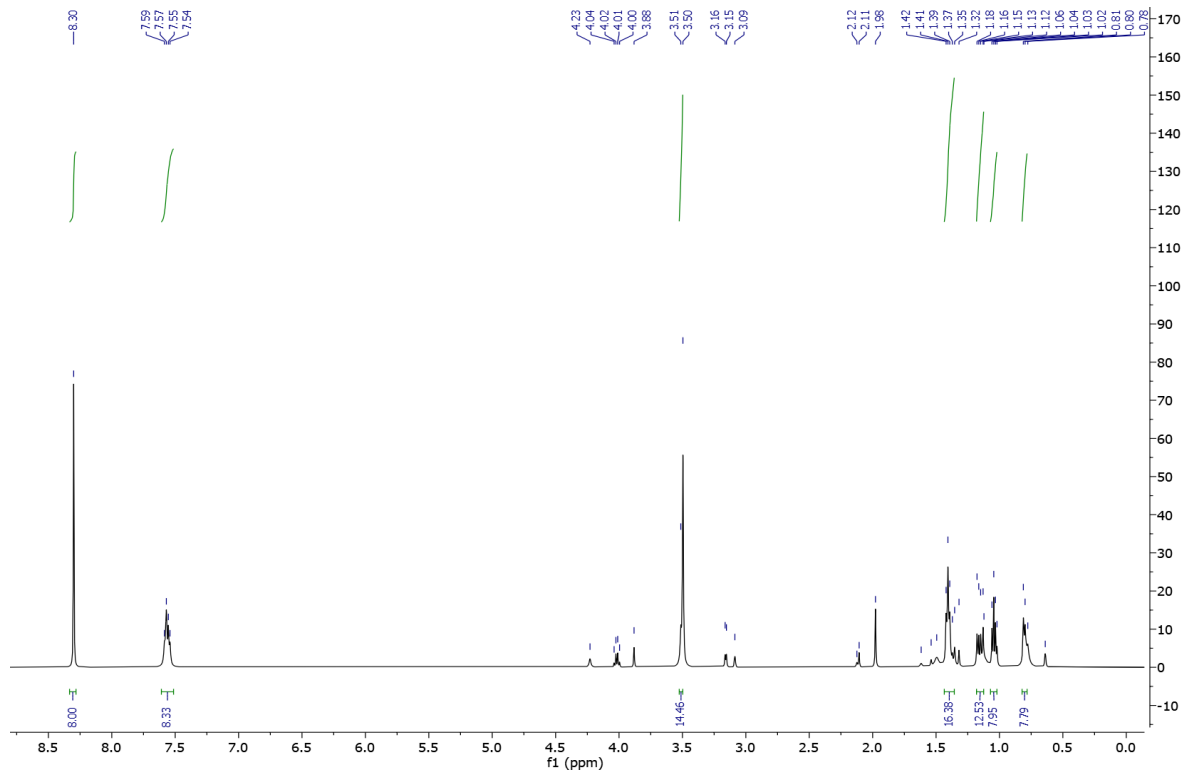

### Mass Spectrum of Compound 1-QSi

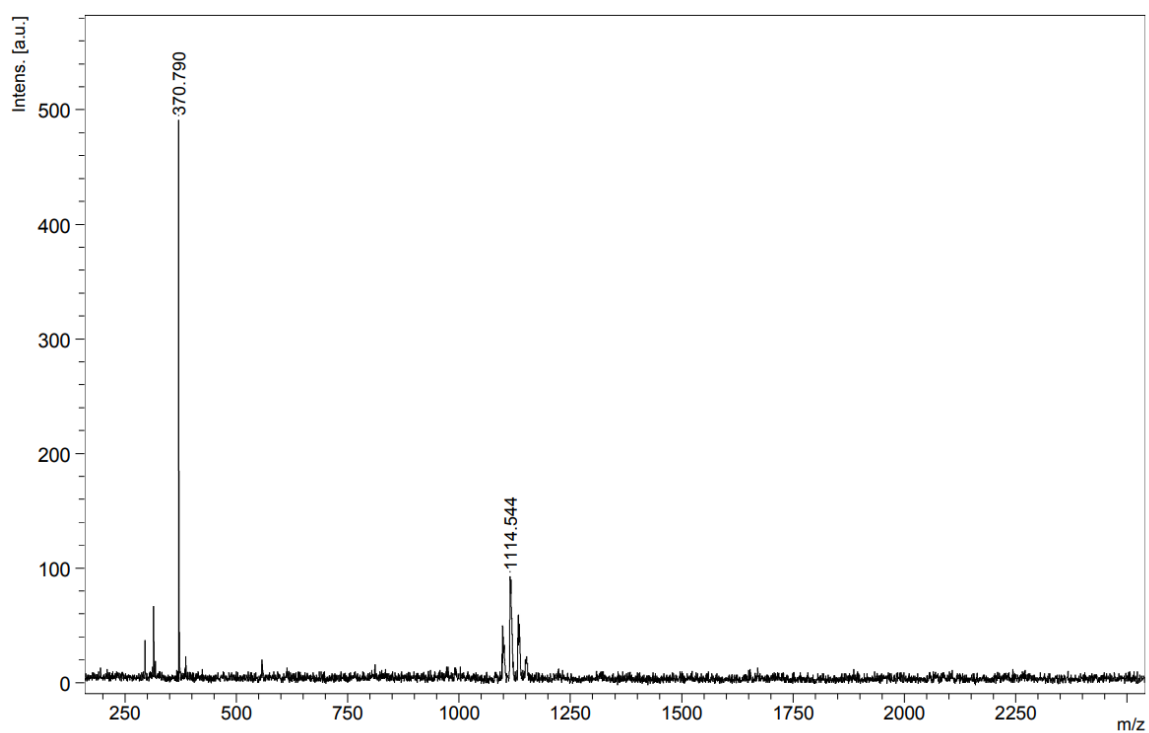

370.790  $[M+Na+3H]^{3+}$ , 1098.322  $[M+H_2O]^+$ , 1114.544  $[2(\text{silicon phthalocyanine ring without axial ligands})+2H_2O-2H]^+$ , 1133.068  $[2M+4Na+2H_2O]^{3+}$

## Mass Spectrum of Compound 2-QSi

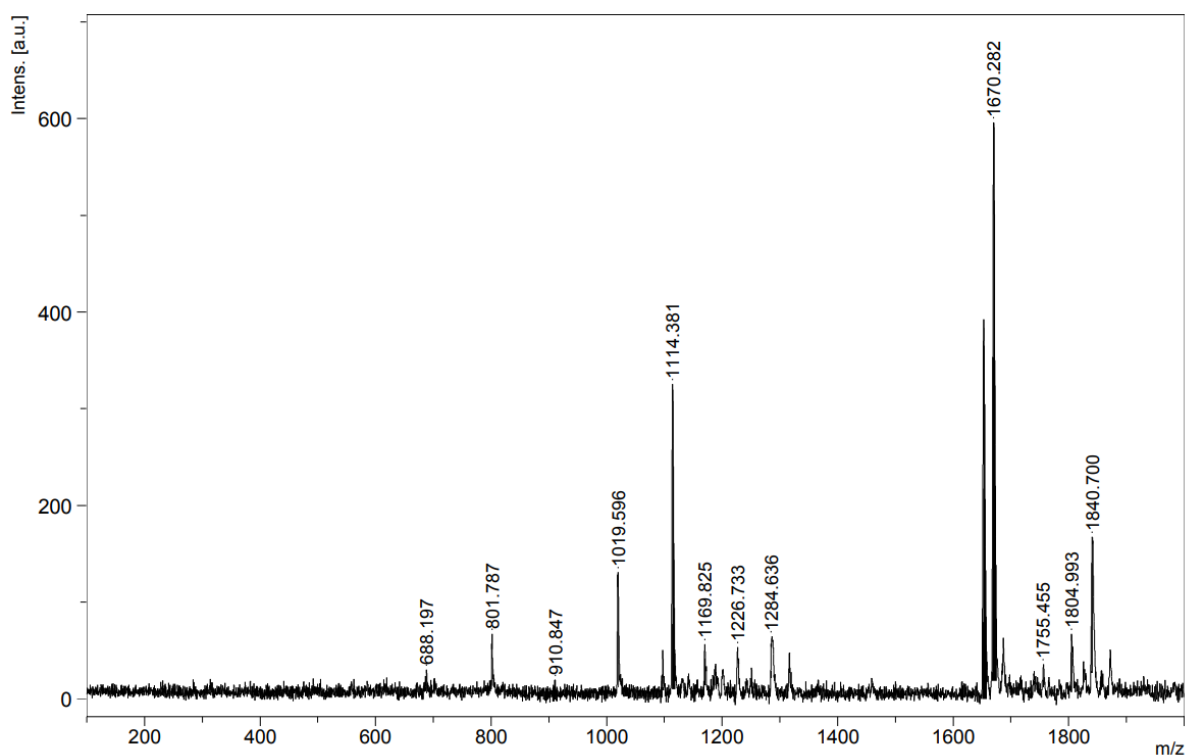

801.787 [M-2C<sub>4</sub>H<sub>9</sub>-2I]<sup>+</sup>, 1019.596 [M-C<sub>4</sub>H<sub>9</sub>-I+2H<sub>2</sub>O]<sup>+</sup>, 1114.381 [2(silicon phthalocyanine ring without axial ligands)+2H<sub>2</sub>O-2H]<sup>+</sup>, 1226.733 [M+Na+2H<sub>2</sub>O-2H]<sup>+</sup>, 1284.636 [M+2Na+3H<sub>2</sub>O-2H]<sup>+</sup>, 1653.009 [3M-2I+3H<sub>2</sub>O]<sup>2+</sup>, 1670.282 [3M-C<sub>4</sub>H<sub>9</sub>-I+H<sub>2</sub>O]<sup>2+</sup>, 1804.993 [3M+3Na+2H<sub>2</sub>O-2H]<sup>2+</sup>, 1840.700 [4M-8I+H<sub>2</sub>O+2H]<sup>2+</sup>

### Mass Spectrum of Compound 3-QSi

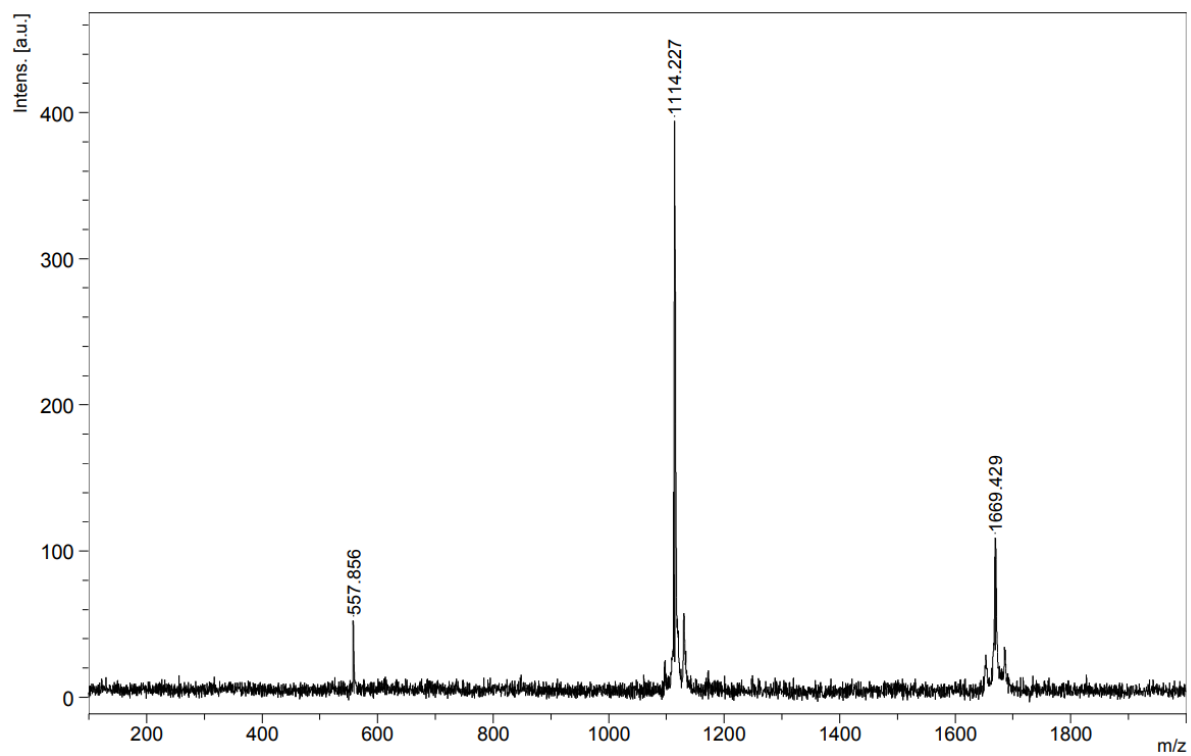

557.856  $[M-CH_3-I]^2+$ , 1114.227  $[2(\text{silicon phthalocyanine ring without axial ligands})+2H_2O-2H]^+$ ,  
1669.429  $[M+2DHB+3Na+2H_2O]^+$
